# Supplementary material for: Exploration of the Mechanism of Lianhua Qingwen in Treating Influenza Virus Pneumonia and New Coronavirus Pneumonia with the Concept of “Different Diseases with the Same Treatment” Based on Network Pharmacology
Source: Hindawi journal article supplement (doi:10.1155/2022/5536266), 2022-02-08
Supplement: f1 [file 5536266.f1.pdf]

## Supplementary Materials

Supplementary Table 1: Molecular docking results.

Supplementary Table 2: The top five components with binding energy less than  $-7.0$  kcal/mol

Supplementary Figure 3: Interactions between the top five components of LHQW with the amino acids of targets related to IVP and NCP with binding energy less than  $-7.0$  kcal/mol.

Supplementary Table 1: Molecular docking results

| Serial number | Molecular             | 3CL                 | ACE2 | COX2 | HA   | NA   | IL6  |
|---------------|-----------------------|---------------------|------|------|------|------|------|
|               |                       | Affinity (kcal/mol) |      |      |      |      |      |
| 1             | Isoforsythiaside      | -8.8                | -9.2 | -9.5 | -7   | -7.2 | -6.8 |
| 2             | Luteolin              | -7.4                | -7.8 | -7.9 | -7.2 | -7.4 | -6.7 |
| 3             | Guaiene               | -5.3                | -6.1 | -6.3 | -6.3 | -6.4 | -5.6 |
| 4             | Rutin                 | -9                  | -8.3 | -9   | -7.1 | -6.8 | -5.6 |
| 5             | Aloe emodin           | -6.9                | -7.5 | -7.3 | -6.4 | -6.9 | -6   |
| 6             | Emodin                | -7                  | -7.3 | -6.9 | -6.8 | -7.1 | -5.9 |
| 7             | Patchouli alcohol     | -5.1                | -5.9 | -5.2 | -6   | -6.1 | -4.8 |
| 8             | Quercitrin            | -8.5                | -7.9 | -8.4 | -7.1 | -7.3 | -6.4 |
| 9             | $\alpha$ -gurjunene   | -5                  | -5.6 | -5.5 | -5.8 | -6.2 | -4.7 |
| 10            | Amygdalin             | -8.1                | -8.2 | -8.5 | -7.2 | -7.6 | -6.1 |
| 11            | Chrysophanol          | -6.9                | -7.3 | -7.6 | -6.6 | -7.3 | -5.7 |
| 12            | Liquiritin            | -7.6                | -7.1 | -8.1 | -7.1 | -6.7 | -6.1 |
| 13            | Isochlorogenic acid B | -7.2                | -8   | -8.7 | -7.7 | -7.9 | -7   |
| 14            | Isochlorogenic acid C | -8.1                | -7.6 | -7.4 | -6.8 | -7.2 | -5.7 |
| 15            | Rhein                 | -7.2                | -7.6 | -7.7 | -6.6 | -7.2 | -6.2 |
| 16            | $\alpha$ -patchoulene | -5.2                | -6   | -5.7 | -6.2 | -6.3 | -5.1 |
| 17            | Salidroside           | -7                  | -6.6 | -7.5 | -6.5 | -6.3 | -6.2 |
| 18            | 4-caffeoylquinic acid | -6.4                | -6.6 | -7.3 | -7.3 | -7.1 | -6.2 |
| 19            | Neochlorogenic acid   | -6.7                | -7.2 | -6.8 | -6.7 | -7.2 | -5.8 |
| 20            | Phillyrin             | -7.8                | -8.6 | -7.6 | -6.9 | -5.9 | -5.7 |
| 21            | (-)-Phillygenin       | -6.9                | -7.6 | -6.9 | -7.1 | -6.1 | -5.5 |
| 22            | Forsythoside E        | -8.4                | -7.8 | -8.7 | -7.3 | -7.4 | -6.3 |
| 23            | chlorogenic acid      | -7.1                | -7.6 | -8.2 | -6.6 | -7.4 | -6.2 |
| 24            | Hyperin               | -8.4                | -8.2 | -7.8 | -7   | -6.9 | -5.5 |

|    |                      |      |      |      |      |      |      |
|----|----------------------|------|------|------|------|------|------|
| 25 | Glycyrrhizic acid    | -7.9 | -7.1 | -6.1 | -7.6 | -2.9 | -5   |
| 26 | Mollugin             | -7.1 | -7.2 | -6.7 | -6.7 | -7.2 | -6   |
| 27 | $\alpha$ -bulnesene  | -5   | -5.8 | -6   | -6.4 | -6.4 | -4.9 |
| 28 | L-menthol            | -4.7 | -5.5 | -5.9 | -4.8 | -5.2 | -4.6 |
| 29 | Hesperidin           | -8.8 | -9.1 | -8.5 | -8   | -7.1 | -6.8 |
| 30 | Caffeic acid         | -5.6 | -5.8 | -6.8 | -5.2 | -5.8 | -5.4 |
| 31 | $\beta$ -patchoulene | -5.2 | -6   | -5.7 | -6.2 | -6.3 | -5.1 |

Supplementary Table 2: The top five components with binding energy less than  $-7.0$  kcal/mol.

| Composition     | 3CL                | ACE2               | COX2                  | HA                    | NA                    | IL6                   |
|-----------------|--------------------|--------------------|-----------------------|-----------------------|-----------------------|-----------------------|
|                 | Rutin              | Isoforsythiaside A | Isoforsythiaside A    | Hesperidin            | Isochlorogenic acid B |                       |
|                 | Isoforsythiaside A | Hesperidin         | Rutin                 | Isochlorogenic acid B | Amygdalin             |                       |
| $-7.0$ kcal/mol | Hesperidin         | Phillyrin          | Isochlorogenic acid B | Glycyrrhizic acid     | Forsythoside E        | Isochlorogenic acid B |
|                 | Quercetin          | Rutin              | Forsythoside E        | Forsythoside E        | Luteolin              |                       |
|                 | Forsythoside E     | Hypericin          | Hesperidin            | 4-caffeoylquinic acid | Chlorogenic acid      |                       |

Supplementary Figure 3: Interactions between the top five components of LHQW with the amino acids of targets related to IVP and NCP with binding energy less than  $-7.0$  kcal/mol.

### Isoforsythiaside-3CL

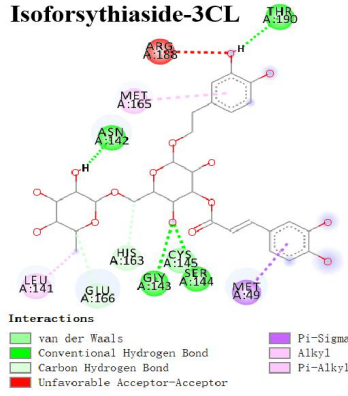

### Hesperidin-3CL

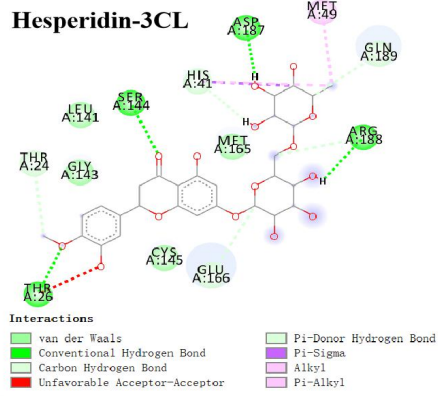

### Quercetin-3CL

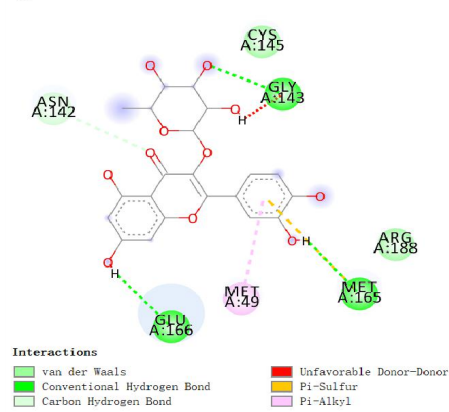

### Forsythoside E-3CL

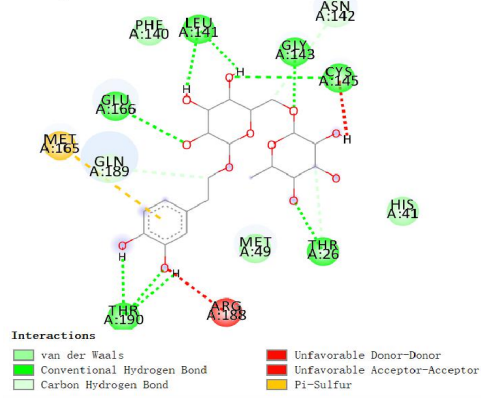

### Hesperidin-ACE2

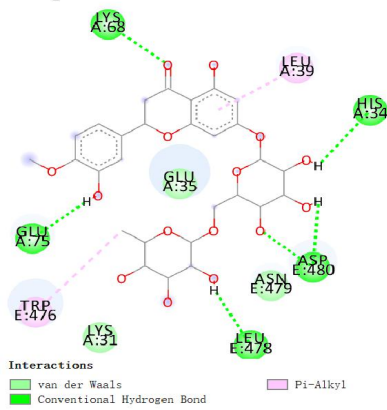

### Phillyrin-ACE2

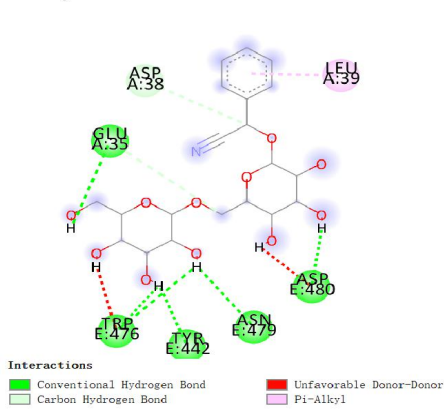

### Rutin-ACE2

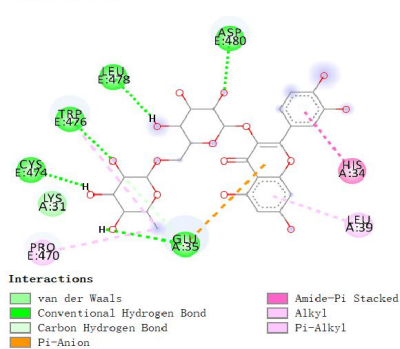

### Hypericin-ACE2

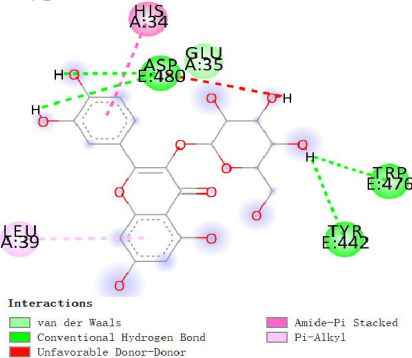

### Amygdalin-NA

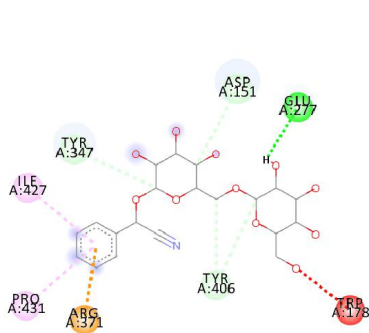

- Interactions**
- Conventional Hydrogen Bond
  - Carbon Hydrogen Bond
  - Unfavorable Acceptor-Acceptor
  - Pi-Cation
  - Pi-Alkyl

### Forsythoside E-NA

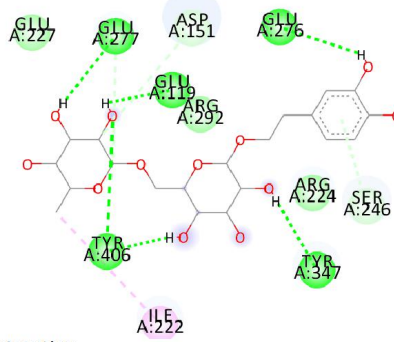

- Interactions**
- van der Waals
  - Conventional Hydrogen Bond
  - Carbon Hydrogen Bond
  - Pi-Donor Hydrogen Bond
  - Alkyl

### Luteolin-NA

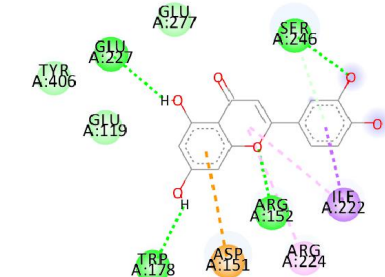

- Interactions**
- van der Waals
  - Conventional Hydrogen Bond
  - Pi-Anion
  - Pi-Donor Hydrogen Bond
  - Pi-Sigma
  - Pi-Alkyl

### Chlorogenic acid-NA

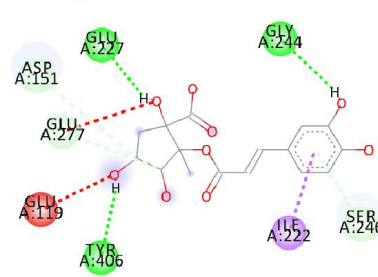

- Interactions**
- Conventional Hydrogen Bond
  - Carbon Hydrogen Bond
  - Unfavorable Acceptor-Acceptor
  - Pi-Donor Hydrogen Bond
  - Pi-Sigma

### Isochlorogenic acid B-HA

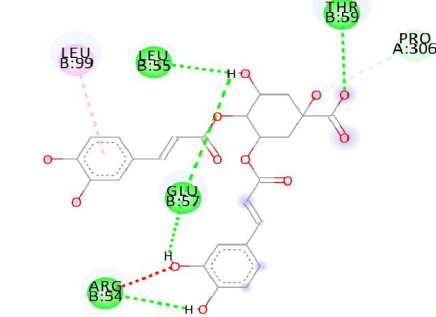

- Interactions**
- Conventional Hydrogen Bond
  - Carbon Hydrogen Bond
  - Unfavorable Acceptor-Acceptor
  - Pi-Alkyl

### Glycyrrhizic acid-HA

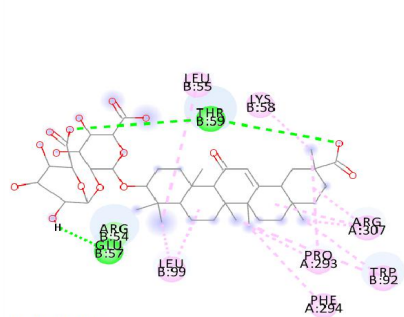

- Interactions**
- van der Waals
  - Conventional Hydrogen Bond
  - Alkyl
  - Pi-Alkyl

### Forsythoside E-HA

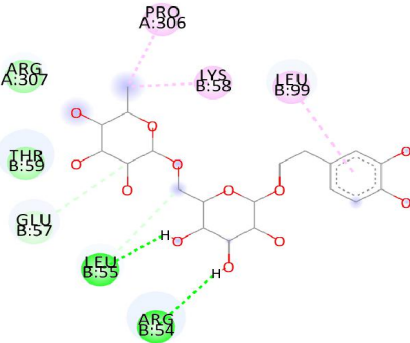

- Interactions**
- van der Waals
  - Conventional Hydrogen Bond
  - Carbon Hydrogen Bond
  - Alkyl
  - Pi-Alkyl

### Caffeoylquinic acid 4-HA

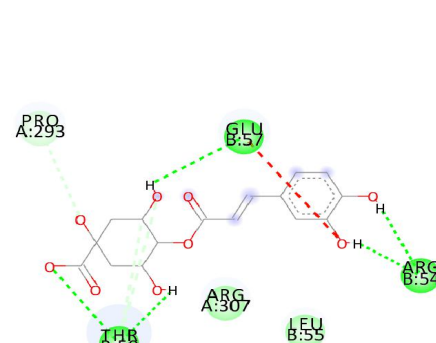

- Interactions**
- van der Waals
  - Conventional Hydrogen Bond
  - Carbon Hydrogen Bond
  - Unfavorable Acceptor-Acceptor

### Amygdalin-NA

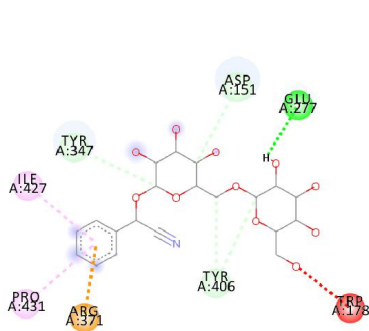

- Interactions**
- Conventional Hydrogen Bond
  - Carbon Hydrogen Bond
  - Unfavorable Acceptor-Acceptor
  - Pi-Cation
  - Pi-Alkyl

### Forsythoside E-NA

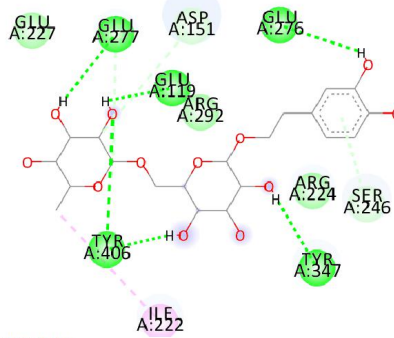

- Interactions**
- van der Waals
  - Conventional Hydrogen Bond
  - Carbon Hydrogen Bond
  - Pi-Donor Hydrogen Bond
  - Alkyl

### Luteolin-NA

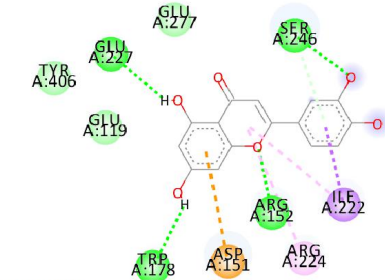

- Interactions**
- van der Waals
  - Conventional Hydrogen Bond
  - Pi-Anion
  - Pi-Donor Hydrogen Bond
  - Pi-Sigma
  - Pi-Alkyl

### Chlorogenic acid-NA

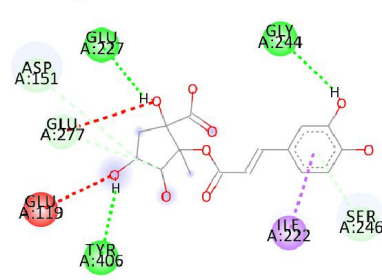

- Interactions**
- Conventional Hydrogen Bond
  - Carbon Hydrogen Bond
  - Unfavorable Acceptor-Acceptor
  - Pi-Donor Hydrogen Bond
  - Pi-Sigma

### Rutin-COX2

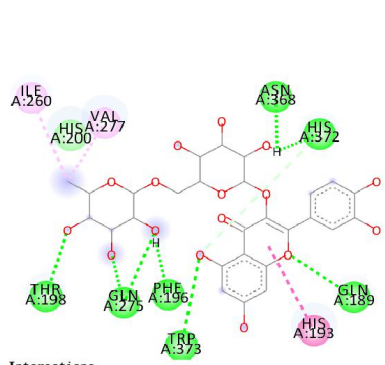

- Interactions**
- van der Waals
  - Conventional Hydrogen Bond
  - Carbon Hydrogen Bond
  - Pi-Pi T-shaped
  - Alkyl

### Isochlorogenic acid B-COX2

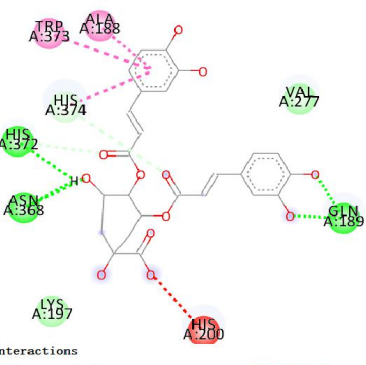

- Interactions**
- van der Waals
  - Conventional Hydrogen Bond
  - Carbon Hydrogen Bond
  - Unfavorable Acceptor-Acceptor
  - Pi-Pi T-shaped
  - Amide-Pi Stacked
  - Pi-Alkyl

### Forsythoside E-COX2

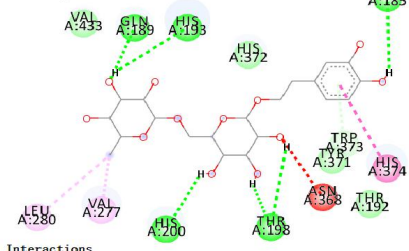

- Interactions**
- van der Waals
  - Conventional Hydrogen Bond
  - Unfavorable Acceptor-Acceptor
  - Pi-Donor Hydrogen Bond
  - Pi-Pi T-shaped
  - Alkyl

### Hesperidin-COX2

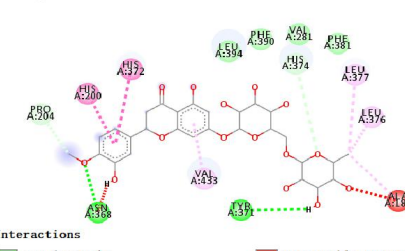

- Interactions**
- van der Waals
  - Conventional Hydrogen Bond
  - Carbon Hydrogen Bond
  - Unfavorable Acceptor-Acceptor
  - Unfavorable Donor-Donor
  - Pi-Pi T-shaped
  - Alkyl
  - Pi-Alkyl
